# Supplementary material for: Genome Sequencing-Based Mining and Characterization of a Novel Alginate Lyase from Vibrio alginolyticus S10 for Specific Production of Disaccharides
Source: MDPI journal article supplement (doi:10.3390/md21110564), 2023-10-27
Supplement: s1 [file s1]

## Supplementary Materials

### Genome Sequencing-Based Mining and Characterization of a Novel Alginate Lyase from *Vibrio alginolyticus* S10 for Specific Production of Disaccharides

Zhiqiang Shu <sup>1,2,†</sup>, Gongming Wang <sup>2,3,†</sup>, Fang Liu <sup>2,3</sup>, Yingjiang Xu <sup>2,3</sup>, Jianan Sun <sup>4,5</sup>, Yang Hu <sup>4,5</sup>, Hao Dong <sup>4,5,\*</sup> and Jian Zhang <sup>2,3,\*</sup>

1 Department of Food Science and Technology, Shanghai Ocean University, Shanghai 200120, China; s13970318519@163.com

2 Shandong Marine Resource and Environment Research Institute, Yantai 264006, China; wgmsd105@163.com

3 Yantai Key Laboratory of Quality and Safety Control and Deep Processing of Marine Food, Yantai 264006, China

4 Qingdao Key Laboratory of Food Biotechnology, College of Food Science and Engineering, Ocean University of China, Qingdao 266404, China

5 Key Laboratory of Biological Processing of Aquatic Products, China National Light Industry, Qingdao 266404, China

\* Correspondence: donghao@ouc.edu.cn (H.D.); zjsd408@163.com (J.Z.)

† These authors contributed equally to this work.

#### Content

Table S1

Figure S1, S2, S3, S4, S5 and S6.

**Table S1.** Genome statistics of strain S10

| Type                     | Length(bp) | Amount |
|--------------------------|------------|--------|
| Whole gene sequence      | 5,397,046  | ---    |
| GC content               | 44.59%     | ---    |
| Total length of CDS      | 4,587,936  | 4,936  |
| Total transposon length  | ---        | 7      |
| Short scattered sequence | ---        | 41     |
| Long scattered sequence  | ---        | 36     |
| Gene island              | ---        | 12     |
| tRNA                     | ---        | 127    |
| rRNA                     | 8,592      | 57     |

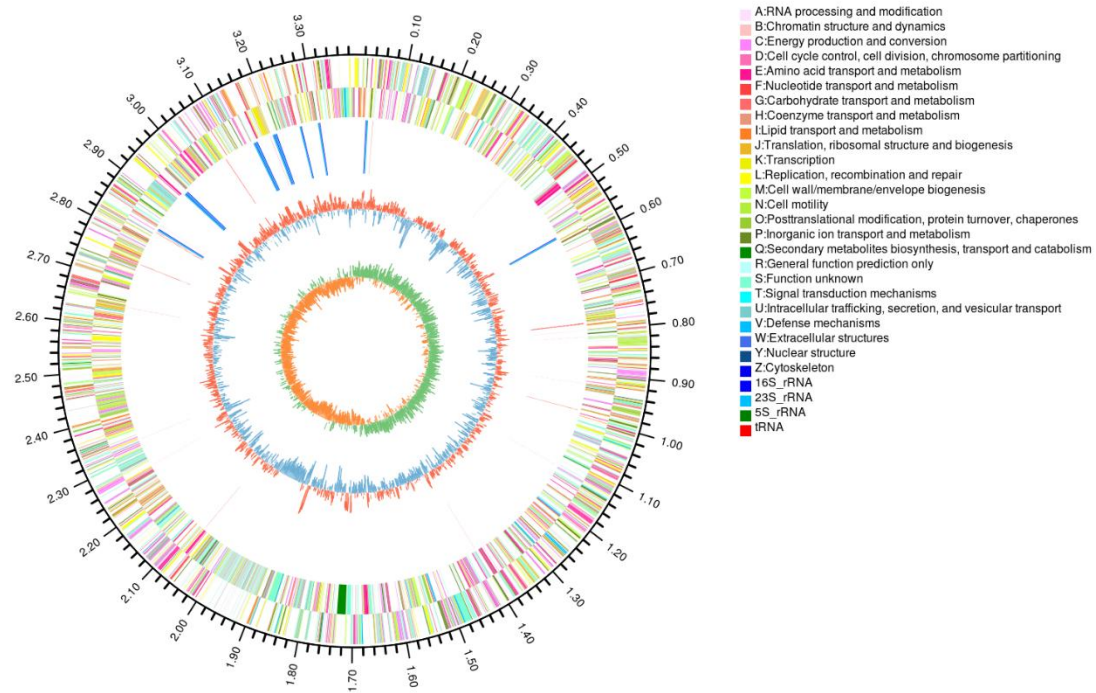

**Figure S1.** Circos map of strain S10 chromosome 1.

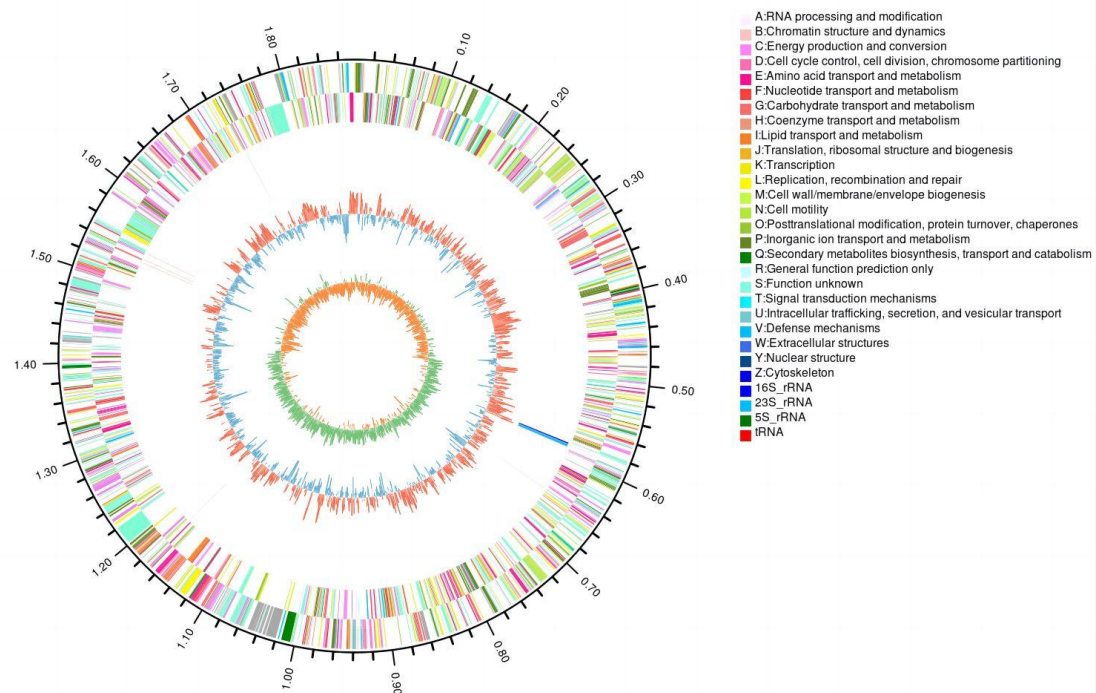

**Figure S2.** Circos map of strain S10 chromosome 2.

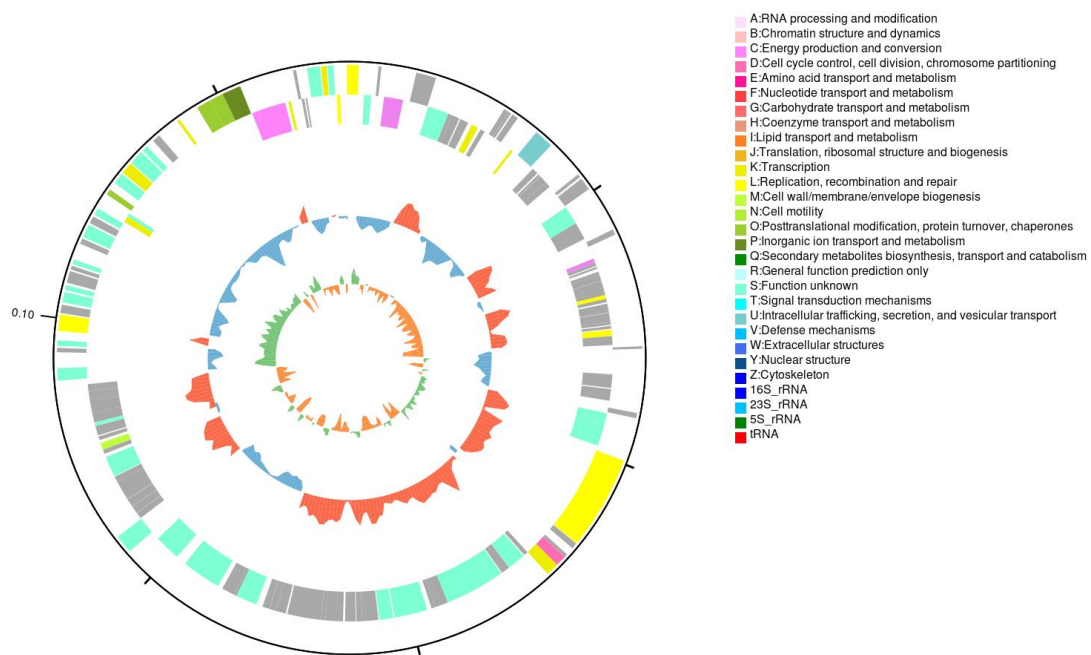

**Figure S3.** Circos map of strain S10 plasmid A.

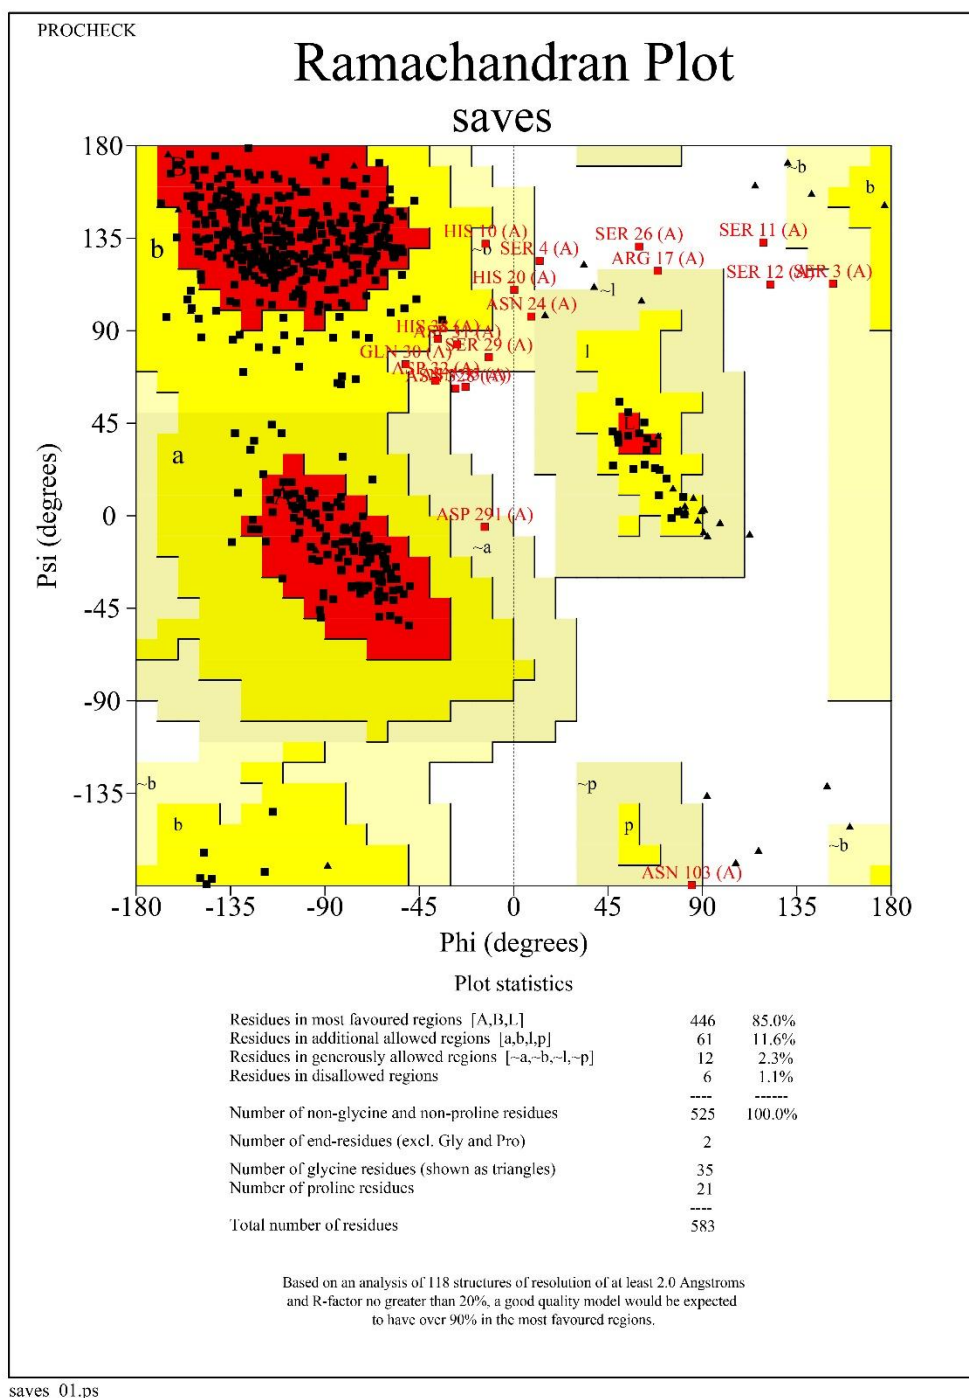

**Figure S4.** Ramachandran plot of the predicted protein structure of Alg4755

Program: ERRAT2  
 File: Gene4755\_88f92\_unrelaxed\_rank\_001\_alphafold2\_ptm\_model\_5\_seed\_000.pdb  
 Chain#:A  
 Overall quality factor\*\*: 95.430

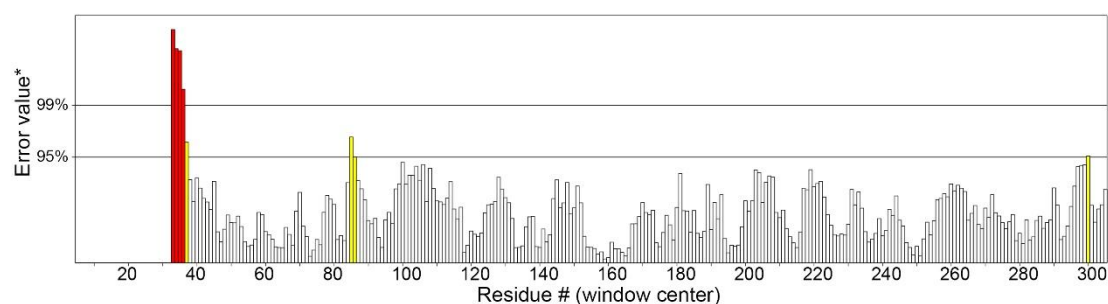

\*On the error axis, two lines are drawn to indicate the confidence with which it is possible to reject regions that exceed that error value.  
 \*\*Expressed as the percentage of the protein for which the calculated error value falls below the 95% rejection limit. Good high resolution structures generally produce values around 95% or higher. For lower resolutions (2.5 to 3Å) the average overall quality factor is around 91%.

Program: ERRAT2  
 File: Gene4755\_88f92\_unrelaxed\_rank\_001\_alphafold2\_ptm\_model\_5\_seed\_000.pdb  
 Chain#:A  
 Overall quality factor\*\*: 95.430

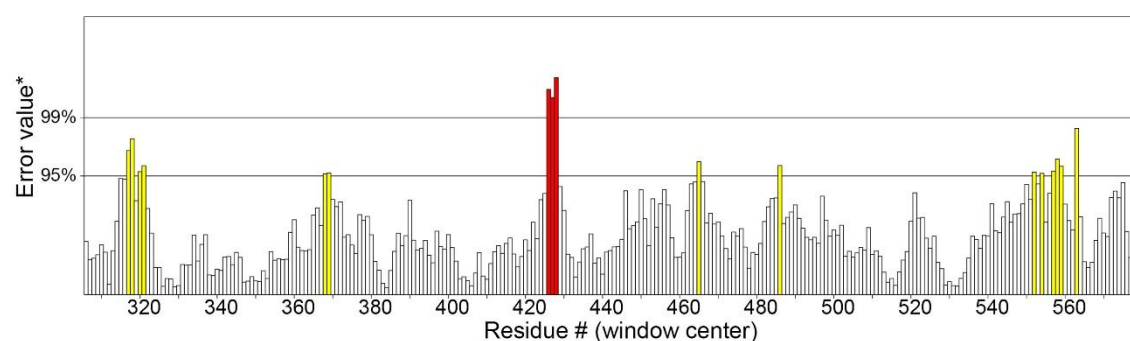

\*On the error axis, two lines are drawn to indicate the confidence with which it is possible to reject regions that exceed that error value.  
 \*\*Expressed as the percentage of the protein for which the calculated error value falls below the 95% rejection limit. Good high resolution structures generally produce values around 95% or higher. For lower resolutions (2.5 to 3Å) the average overall quality factor is around 91%.

**Figure S5.** ERRAT detection results of Alg4755 predicted protein structure.

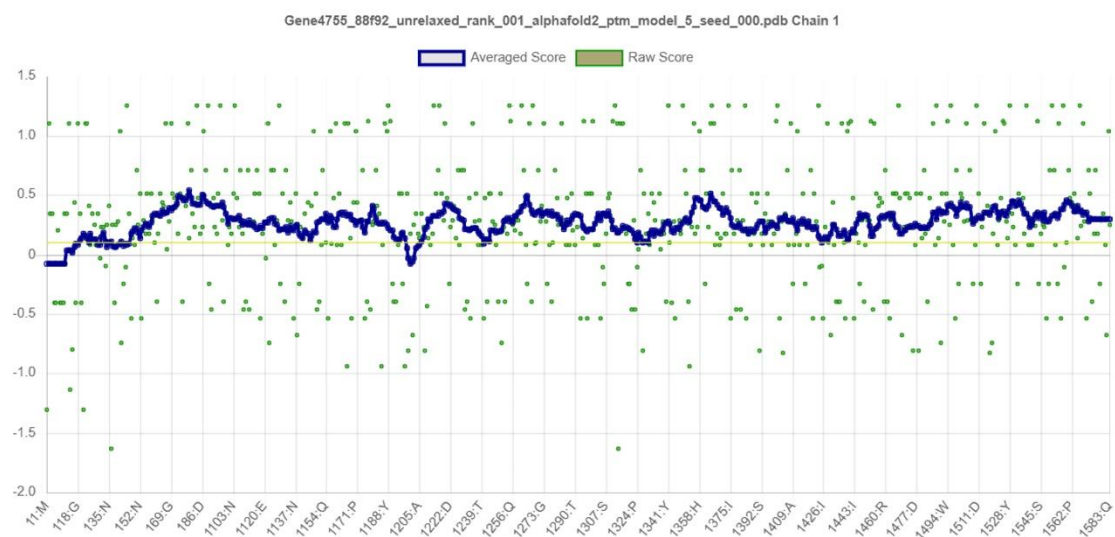

**Figure S6.** Verify3D detection results of Alg4755 predicted protein structure.
